# Supplementary material
Source: PubMed Central journal article supplement (PMC5743435)
Supplement: NIHMS923967-supplement-Supplemental_2.pdf [file NIHMS923967-supplement-Supplemental_2.pdf]

S2a

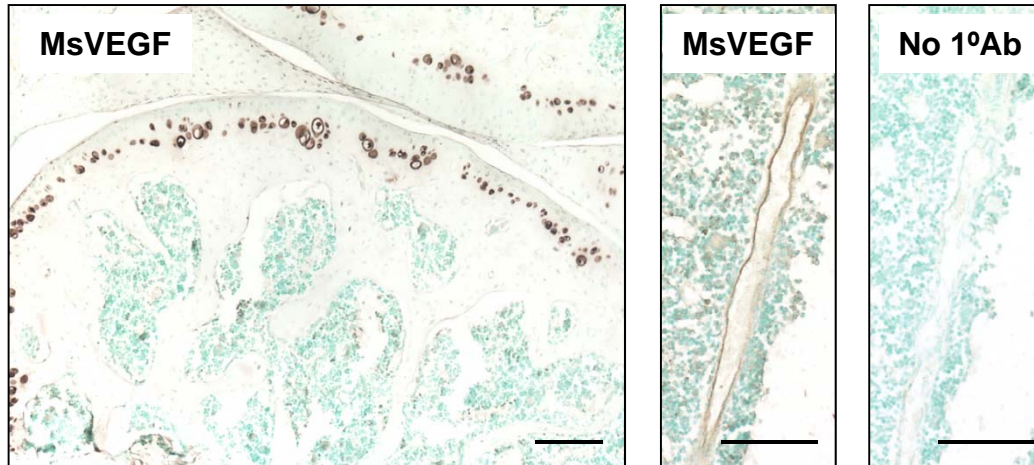

**S2. Specificity of the antibodies used in this study.** (a) The expression level of VEGFA in the chondrocytes of the articular cartilage of the femur (left panel) and around the blood vessels in the bone marrow (middle panel) served as positive controls for our anti-VEGFA antibody (see absence of stain in section incubated without primary antibody – right panel). Scale bars=100mm.
